# Supplementary material for: Mapping the Landscape of Magnetic Field Effects on Neural Regeneration and Repair: A Combined Systematic Review, Mathematical Model, and Meta-Analysis
Source: Hindawi journal article supplement (doi:10.1155/2023/5038317), 2023-09-21
Supplement: f1 [file 5038317.f1.zip]

**Table S5: Article counts used for simulations**

X - axis: Number of manuscripts, number of datapoints, average number of datapoints per manuscript (rounded to nearest integer), standard deviation (rounded to nearest integer), median, number of unique independent variable (for example, if the dataset is 0, 0, 1, 2, there are 3 unique independent variable points)

Y - axis: maturation, proliferation, viability, neuro/ astrocyte/oligodendrocyte differentiation

|                                           | Number of manuscripts | Number of datapoints | Average number of datapoints per manuscript | Standard Deviation | Median | Number of unique independent variables |           |            |
|-------------------------------------------|-----------------------|----------------------|---------------------------------------------|--------------------|--------|----------------------------------------|-----------|------------|
|                                           |                       |                      |                                             |                    |        | Magnitude                              | Frequency | Total Time |
| Neural Stem/Progenitor Cell Maturation    | 4                     | 31                   | 6                                           | 5                  | 4      | 3                                      | 3         | 8          |
| Neural Stem/Progenitor Cell Proliferation | 13                    | 192                  | 15                                          | 13                 | 12     | 10                                     | 3         | 33         |
| Neural Stem/Progenitor Cell Viability     | 11                    | 125                  | 12                                          | 15                 | 8      | 8                                      | 3         | 26         |
| Neuron differentiation                    | 17                    | 147                  | 9                                           | 5                  | 8      | 14                                     | 4         | 27         |
| Astrocyte differentiation                 | 5                     | 22                   | 4                                           | 4                  | 2      | 9                                      | 3         | 8          |
| Oligodendrocyte Differentiation           | 3                     | 30                   | 10                                          | 7                  | 6      | 3                                      | 2         | 7          |
