# Supplementary material for: Mapping the Landscape of Magnetic Field Effects on Neural Regeneration and Repair: A Combined Systematic Review, Mathematical Model, and Meta-Analysis
Source: Hindawi journal article supplement (doi:10.1155/2023/5038317), 2023-09-21
Supplement: f1 [file 5038317.f1.zip]

**Table S3: Descriptions of included text outcome variables**

Study Title (Manuscript title), Cell type, Magnitude (mT), Field Type, Frequency (Hz), Outcome Variable

| Study Title                                                                                                                                                           | Cell type                             | Magnitude (mT)              | Field Type | Frequency (Hz)                                                                                       | Outcome Variable                                                                                                       |
|-----------------------------------------------------------------------------------------------------------------------------------------------------------------------|---------------------------------------|-----------------------------|------------|------------------------------------------------------------------------------------------------------|------------------------------------------------------------------------------------------------------------------------|
| The effects of high-intensity pulsed electromagnetic field on proliferation and differentiation of neural stem cells of neonatal rats in vitro                        | neonatal murine NSCs                  | 500,1000,3K,4K,5K,6K,8K,10K | Dynamic    | 0.1                                                                                                  | morphology, growth patterns, viability                                                                                 |
| Extremely low-frequency electromagnetic fields promote in vitro neuronal differentiation and neurite outgrowth of embryonic neural stem cells via up-regulating TRPC1 | embryonic murine neural stem cells    | 1                           | Dynamic    | 50 Hz (1-3 days, 4 hours/day)                                                                        | proliferation, differentiation, neurite growth, apoptosis, proneural genes, TRPC1 (diff/neurite marker)                |
| The effect of magnetic stimulation on differentiation of human induced pluripotent stem cells into neuron                                                             | human iPSC                            | 2400, 4800                  | Dynamic    | 10, 1 (train duration of 0.5s and 200s, respectively, intertrain interval of 6 and 20s, 1200 pulses) | differentiation, proliferation, excitatory/inhibitory signals, synapse formation                                       |
| Extremely low frequency magnetic field induces human neuronal differentiation through NMDA receptor activation                                                        | hNPCs (human neural progenitor cells) | 1                           | dynamic    | 50                                                                                                   | differentiation, migration, morphology                                                                                 |
| Extremely low-frequency electromagnetic fields affect transcript levels of neuronal differentiation-related genes in embryonic neural stem cells                      | eNSCs (embryonic neural stem cells)   | 0.5,1,2                     | dynamic    | 50                                                                                                   | viability, DNA synthesis, diameter of neurospheres, cell cycle (related genes), differentiation                        |
| Possible promotion of neuronal differentiation in fetal rat brain neural progenitor cells after sustained exposure to static magnetism                                | NPCs (embryonic murine)               | 100                         | static     | --                                                                                                   | differentiation, gene expression                                                                                       |
| Extremely low-frequency electromagnetic fields promote in vitro neurogenesis via upregulation of Ca(v)1-channel activity                                              | NSCs (neonatal murine)                | 1                           | dynamic    | 50                                                                                                   | differentiation, proliferation, physiology (Ca channels), role of Ca channels on differentiation, CREB phosphorylation |
| Elimination of the geomagnetic field stimulates the proliferation of mouse neural progenitor and stem cells                                                           | nPCs/ NSCs from C57BL/76 mice         | <0.0002                     | static     | --                                                                                                   | growth, self-renewal, multipotency, growth factor supplementation, proliferation                                       |

|                                                                                                                                                       |                                                         |             |         |                                                                                                                                                                                                                                                          |                                                                                                      |
|-------------------------------------------------------------------------------------------------------------------------------------------------------|---------------------------------------------------------|-------------|---------|----------------------------------------------------------------------------------------------------------------------------------------------------------------------------------------------------------------------------------------------------------|------------------------------------------------------------------------------------------------------|
| Low-Field Magnetic Stimulation Accelerates the Differentiation of Oligodendrocyte Precursor Cells via Non-canonical TGF- $\beta$ 2 Signaling Pathways | CH4 (murine glial--progenitor) and B104 (neuroblastoma) | ??          | dynamic | pulses--'Every 2-s pulse was composed of 80 rhythmical trains spiking for 6 ms in 19-ms intervals, which constituted the intermittent gamma burst stimulation at 40 Hz. Each train consisted of six pulses with 130 $\mu$ s width and 1000-Hz frequency' | proliferation, differentiation, TGF-B1 expression                                                    |
| Effect of magnetic stimulation on the gene expression profile of in vitro cultured neural cells                                                       | primary embryonic murine neural cells                   | 133 and 640 | Dynamic | biphasic, sinus-shaped pulses of 280 $\mu$ s [~3570 Hz] pulse width'; two simulation patterns--A: 8 impulses w a repetition rate of 70 Hz and sequence interval of 4s; B: 20 impulses w rr of 30 Hz and si of 4s                                         | neural stem cell differentiation status, signal activity, gene expression (qRT-PCR assay and single) |
| Effects of electromagnetic field (PEMF) exposure at different frequency and duration on the peripheral nerve regeneration: in vitro and in vivo study | immortalized murine Schwann cells (iSCs)                | 1           | Dynamic | 50 Hz and 150 Hz (1 hour/day and 12 hour/day for 4 different conditions total)                                                                                                                                                                           | cell proliferation, mRNA expression (S100 and brain-derived neurotrophic factor)                     |
| Pulsed magnetic field promotes proliferation and neurotrophic genes expression in Schwann cells in vitro                                              | primary neonatal murine Schwann cells                   | 0-20        | Dynamic | 50                                                                                                                                                                                                                                                       | survival, morphology, proliferation, gene expression, protein levels                                 |
| Comparison of effects of high- and low-frequency electromagnetic fields on proliferation and differentiation of neural stem cells                     | primary neonatal murine neural cells (hippocampal)      | 5 and 2500  | Dynamic | 50; (30 and 10 min/day, respectively)                                                                                                                                                                                                                    | proliferation, differentiation (and markers for it), mRNA expression                                 |

|                                                                                                                                                                                        |                                                                         |               |         |                                                                     |                                                                                                                                          |
|----------------------------------------------------------------------------------------------------------------------------------------------------------------------------------------|-------------------------------------------------------------------------|---------------|---------|---------------------------------------------------------------------|------------------------------------------------------------------------------------------------------------------------------------------|
| Neurophysiological Effects Induced in the Nervous Tissue by Low-Frequency, Pulsed Magnetic Fields                                                                                      | murine hippocampal slices, synaptosomes                                 | 15            | Dynamic | 0.03, 0.07, 0.16, 0.5 (pulsed)                                      | evoked potentials (population spikes), neurotransmitter and calcium accumulation, glutamate uptake, neuronal excitability                |
| Astrocytes contribute to the neuronal recovery promoted by high-frequency repetitive magnetic stimulation in in vitro models of ischemia                                               | primary embryonic murine neural cells                                   | Not mentioned | Dynamic | 10 Hz (24 trains of 50 pulses, biphasic waveform of 280us duration) | viability, synaptic and neurite morphology modifications, ERK1/2 and c-Fos expression                                                    |
| High-frequency repetitive transcranial magnetic stimulation improves functional recovery by inhibiting neurotoxic polarization of astrocytes in ischemic rats                          | primary embryonic murine neurons and primary neonatal murine astrocytes | 1900          | Dynamic | 1, 5, 10 (600 pulses in 10 minutes every day for 2 days)            | viability, resistance to alteration and alleviation of neurotoxic effects due to O <sub>2</sub> /Glucose deprivation, synaptic formation |
| Repetitive magnetic stimulation promotes neural stem cells proliferation by upregulating MiR-106b in vitro                                                                             | primary murine neonatal neural cells (hippocampal)                      | 3500          | Dynamic | 10 (200,400,...1000 pulses/day, stimulation interval time=10s)      | proliferation, miRNA expression, gene/protein expression, cyclin-dependent kinase                                                        |
| Static Magnetic Field Induced Neural Stem/Progenitor Cell Early Differentiation and Promotes Maturation                                                                                | primary murine neonatal neural cells                                    | 510 +- 10     | Static  | -                                                                   | proliferation, cell cycle (and cell cycle related proteins), differentiation, morphology, electrophysiology                              |
| Neuronal differentiation of chromaffin cells in vitro, induced by extremely low frequency magnetic fields or nerve growth factor: A histological and ultrastructural comparative study | primary neonatal murine chromaffin cells                                | 0.7           | Static  | -- (4hour/day for 7 days)                                           | proliferation, morphology, electron density, cytoskeleton (growth cones, filopodia, neuritic projections, varicosities)                  |
| In vitro developmental neurotoxicity following chronic exposure to 50 Hz extremely low-frequency electromagnetic fields in primary rat cortical cultures                               | primary embryonic murine neural cells                                   | 0.001-1       | Dynamic | 50 Hz (7 days)                                                      | viability, calcium concentrations, neurite length, electrical activity                                                                   |
| Extremely low frequency magnetic fields promote neurite varicosity formation and cell excitability in cultured rat chromaffin cells                                                    | primary murine chromaffin cells                                         | 1             | Dynamic | 60 Hz                                                               | morphology, neurite outgrowth, electrical activity, resting membrane potential, action potential                                         |

|                                                                                                                                                             |                                                                |                             |         |                                                                                                                                                                                                       |                                                                                                                                 |
|-------------------------------------------------------------------------------------------------------------------------------------------------------------|----------------------------------------------------------------|-----------------------------|---------|-------------------------------------------------------------------------------------------------------------------------------------------------------------------------------------------------------|---------------------------------------------------------------------------------------------------------------------------------|
| Effects of repetitive magnetic stimulation on the growth of primarily cultured hippocampus neurons in vitro and their expression of iron-containing enzymes | primary neonatal murine neural cells (hippocampal)             | 1680, 2520, 4200            | Dynamic | 1 Hz (3 pulse trains, each containing 100 pulses at 1 Hz, 60s interval between sequences)                                                                                                             | morphology, survival, catalase/protein kinase A expression, aconitase (metabolic marker)                                        |
| Neurite Outgrowth on Chromaffin Cells Applying Extremely Low Frequency Magnetic Fields by Permanent Magnets                                                 | primary murine chromaffin cells                                | 0-45                        | Dynamic | 4,7,10, and 12 Hz (1,3,5,7 days and 2,4,6,8 hours/day)                                                                                                                                                | morphology, neurite outgrowth                                                                                                   |
| Directed and enhanced neurite growth with pulsed magnetic field stimulation                                                                                 | dorsal root ganglia from murine embryos                        | ??                          | dynamic | varies with pulse width (5-20us), time between pulses (50-200 us), number of pulses (22-88), repetition rate (15-25Hz), current (15-25A), Magnetic vector potential (5-8.33*10 <sup>-6</sup> Weber/m) | neurite outgrowth                                                                                                               |
| Acute and chronic effects of exposure to a 1-mT magnetic field on the cytoskeleton, stress proteins, and proliferation of astroglial cells in culture       | primary astroglial cells (cerebral hemispheres of Wistar rats) | 1                           | both    | 50 Hz                                                                                                                                                                                                 | hsp, actin, GFAP, morphology, proliferation                                                                                     |
| Low frequency pulsed electromagnetic field promotes differentiation of oligodendrocyte precursor cells through upregulation of miR-219-5p in vitro          | murine oligodendrocyte precursor cells                         | 1.8                         | dynamic | 50Hz (pulsed square)                                                                                                                                                                                  | differentiation, miR-219-5p and Lingo1 expression                                                                               |
| Static Magnetic Field Stimulation Enhances Oligodendrocyte Differentiation and Secretion of Neurotrophic Factors                                            | hiPSC derived oligodendrocyte precursor cells                  | 300                         | static  | --                                                                                                                                                                                                    | gene expression of cell activity, mature oligodendrocyte, secretion of neurotrophic factors. myelination capacity, calcium flux |
| Effects of static magnetic fields on primary cortical neurons                                                                                               | primary murine neurons (neonatal, cortical)                    | 100,500,750,100,020,000,000 | static  | --                                                                                                                                                                                                    | phosphorylation response of ERK and JNK, JNK                                                                                    |

|                                                                                                                                                                       |                                                             |          |         |       |                                                                                                                                      |
|-----------------------------------------------------------------------------------------------------------------------------------------------------------------------|-------------------------------------------------------------|----------|---------|-------|--------------------------------------------------------------------------------------------------------------------------------------|
| Differentiation of chromaffin cells elicited by ELF MF modifies gene expression pattern                                                                               | chromaffin cells (neontal murine)                           | 0.7      | dynamic | 60    | gene expression                                                                                                                      |
| Effects of 50 Hz electromagnetic fields on voltage-gated Ca <sup>2+</sup> channels and their role in modulation of neuroendocrine cell proliferation and death        | rat pituitary GH3 cells (and human neuroblastoma IMR32)     | 0.005-10 | dynamic | 1-100 | proliferation, apoptosis, current through Ca channels, Ca channel expression                                                         |
| Extremely Low-Frequency Electromagnetic Fields Promote In Vitro Neuronal Differentiation and Neurite Outgrowth of Embryonic Neural Stem Cells via Up-Regulating TRPC1 | eNSCs (from murine embryonic telencephalons)                | 1        | dynamic | 50    | proliferation, maintenance, differentiation, neurite outgrowth, apoptosis, proneural genes, TRPC1 (Calcium channel) gene expression, |
| Extremely low-frequency electromagnetic fields enhance the proliferation and differentiation of neural progenitor cells cultured from ischemic brains                 | murine embryonic and ischemic brain neural progenitor cells | 0.4      | dynamic | 50    | proliferation, differentiation, phosphorylated protein kinase B                                                                      |
| Magnetic field exposure saves rat cerebellar granule neurons from apoptosis in vitro                                                                                  | cerebellar granule neurons (neonatal murine)                | 300      | dynamic | 50    | apoptosis, induced currents                                                                                                          |
| Fifty Hertz Extremely Low-Frequency Magnetic Field Exposure Elicits Redox and Trophic Response in Rat-Cortical Neurons                                                | murine embryonic cortical neurons                           | 0.1,1    | dynamic | 50    | neuronal viability, redox status/membrane peroxidative damage, neurotrophin and cytokine expressions                                 |
| NEUROPROTECTIVE EFFECT OF WEAK STATIC MAGNETIC FIELDS IN PRIMARY NEURONAL CULTURES                                                                                    | neonatal murine cortical and hippocampal neurons            | 5        | static  | --    | apoptosis, MMP collapse, Ca influx, mRNA/protein expression of VGCCs                                                                 |
| Extremely low-frequency electromagnetic fields enhance the survival of newborn neurons in the mouse hippocampus                                                       | NSCs (neonatal murine hippocampal)                          | 1        | dynamic | 50    | apoptosis                                                                                                                            |
| Epigenetic Modulation of Adult Hippocampal Neurogenesis by Extremely Low-Frequency Electromagnetic Fields                                                             | NSCs (neonatal murine hippocampal)                          | 1        | dynamic | 50    | proliferation, differentiation, gene promoters                                                                                       |
| Electromagnetic fields affect transcript levels of apoptosis-related genes in embryonic stem cell-derived neural progenitor cells                                     | murine embryonic stem cells                                 | 2        | dynamic | 50    | differentiation markers (mRNA transcripts), cytogenetic effects, proliferation, apoptosis,                                           |
