# Supplementary material for: Mapping the Landscape of Magnetic Field Effects on Neural Regeneration and Repair: A Combined Systematic Review, Mathematical Model, and Meta-Analysis
Source: Hindawi journal article supplement (doi:10.1155/2023/5038317), 2023-09-21
Supplement: f1 [file 5038317.f1.zip]

**Table S4: ARRIVE Guideline Scoring on a per article basis**

X-axis: The numbers correspond to the ARRIVE guideline ranking on a scale from 0 - 2. Since there were two reviewers, if the ARRIVE guideline ranking varied by only 1, the rankings were averaged. If different by 2 (one reviewer chose 0 and one chose 2), the article was discussed and a consensus was reached.

| Article Title                                                                                                                                               | 1   | 2   | 3 | 4 | 5 | 6   | 7   | 8   | 9   | 10  | 11  | 12  | 13 | 17  | 18  | 19 | 20 | 21 |
|-------------------------------------------------------------------------------------------------------------------------------------------------------------|-----|-----|---|---|---|-----|-----|-----|-----|-----|-----|-----|----|-----|-----|----|----|----|
| Acute and chronic effects of exposure to a 1-mT magnetic field on the cytoskeleton, stress proteins, and proliferation of astroglial cells in culture       | 2   | 1   | 0 | 0 | 0 | 2   | 0   | 0   | 2   | 2   | 2   | 2   | 2  | 1   | 0   | 0  | 0  | 0  |
| Astrocytes contribute to the neuronal recovery promoted by high-frequency repetitive magnetic stimulation in in vitro models of ischemia                    | 2   | 1.5 | 0 | 2 | 2 | 2   | 1   | 2   | 2   | 2   | 1.5 | 2   | 2  | 1.5 | 1.5 | 0  | 2  | 2  |
| Comparison of effects of high- and low-frequency electromagnetic fields on proliferation and differentiation of neural stem cells                           | 2   | 0   | 0 | 0 | 0 | 1.5 | 1   | 1   | 2   | 1.5 | 2   | 2   | 2  | 1.5 | 1.5 | 0  | 0  | 2  |
| Differentiation of chromaffin cells elicited by ELF MF modifies gene expression pattern                                                                     | 2   | 0.5 | 0 | 0 | 0 | 2   | 0   | 1.5 | 2   | 2   | 1.5 | 2   | 2  | 1.5 | 1   | 0  | 0  | 1  |
| Directed and enhanced neurite growth with pulsed magnetic field stimulation                                                                                 | 2   | 1.5 | 0 | 2 | 2 | 2   | 1.5 | 1.5 | 2   | 1   | 2   | 2   | 2  | 2   | 1   | 0  | 0  | 0  |
| Effect of magnetic stimulation on the gene expression profile of in vitro cultured neural cells                                                             | 2   | 0.5 | 0 | 2 | 0 | 2   | 0.5 | 2   | 2   | 0   | 1.5 | 2   | 2  | 2   | 2   | 0  | 0  | 0  |
| Effects of electromagnetic field (PEMF) exposure at different frequency and duration on the peripheral nerve regeneration: in vitro and in vivo study       | 1.5 | 1   | 0 | 2 | 0 | 2   | 1.5 | 2   | 2   | 2   | 2   | 2   | 2  | 1.5 | 1.5 | 0  | 0  | 2  |
| Effects of repetitive magnetic stimulation on the growth of primarily cultured hippocampus neurons in vitro and their expression of iron-containing enzymes | 2   | 0   | 0 | 2 | 0 | 1.5 | 2   | 1.5 | 1.5 | 2   | 2   | 1.5 | 2  | 2   | 1.5 | 0  | 0  | 2  |
| Effects of static magnetic fields on primary cortical neurons                                                                                               | 2   | 1   | 0 | 0 | 0 | 1   | 0   | 1.5 | 1.5 | 2   | 2   | 1   | 1  | 0.5 | 0.5 | 0  | 0  | 1  |
| Elimination of the geomagnetic field stimulates the proliferation of mouse neural progenitor and stem cells                                                 | 2   | 0.5 | 0 | 2 | 0 | 2   | 1   | 2   | 2   | 2   | 2   | 2   | 2  | 1.5 | 1   | 0  | 2  | 2  |
| Extremely low frequency magnetic field induces human neuronal differentiation through NMDA receptor activation                                              | 2   | 1.5 | 0 | 0 | 0 | 2   | 1   | 1.5 | 1.5 | 2   | 2   | 2   | 2  | 1.5 | 1   | 0  | 0  | 2  |
| Extremely low frequency magnetic fields promote neurite varicosity formation and cell excitability in cultured rat chromaffin cells                         | 2   | 1   | 0 | 2 | 0 | 2   | 0.5 | 0.5 | 1.5 | 1.5 | 0.5 | 2   | 2  | 1.5 | 1   | 0  | 0  | 0  |

|                                                                                                                                                                                        |     |     |     |   |   |     |     |     |     |     |     |     |   |     |     |   |   |   |
|----------------------------------------------------------------------------------------------------------------------------------------------------------------------------------------|-----|-----|-----|---|---|-----|-----|-----|-----|-----|-----|-----|---|-----|-----|---|---|---|
| Extremely low-frequency electromagnetic fields affect transcript levels of neuronal differentiation-related genes in embryonic neural stem cells                                       | 2   | 1.5 | 0   | 2 | 2 | 2   | 1   | 1.5 | 2   | 2   | 2   | 2   | 2 | 1.5 | 1.5 | 0 | 0 | 2 |
| Extremely low-frequency electromagnetic fields promote in vitro neurogenesis via upregulation of Ca(v)1-channel activity                                                               | 1.5 | 1.5 | 0.5 | 2 | 2 | 2   | 1   | 1.5 | 2   | 2   | 2   | 2   | 2 | 1.5 | 1.5 | 0 | 0 | 0 |
| Extremely low-frequency electromagnetic fields promote in vitro neuronal differentiation and neurite outgrowth of embryonic neural stem cells via up-regulating TRPC1                  | 2   | 1.5 | 0.5 | 2 | 2 | 2   | 1   | 1.5 | 2   | 2   | 2   | 2   | 2 | 1.5 | 1.5 | 0 | 2 | 2 |
| High-frequency repetitive transcranial magnetic stimulation improves functional recovery by inhibiting neurotoxic polarization of astrocytes in ischemic rats                          | 1.5 | 1   | 0   | 2 | 0 | 2   | 1.5 | 2   | 2   | 2   | 2   | 2   | 2 | 2   | 2   | 0 | 2 | 0 |
| In vitro developmental neurotoxicity following chronic exposure to 50 Hz extremely low-frequency electromagnetic fields in primary rat cortical cultures                               | 2   | 1.5 | 1   | 0 | 2 | 2   | 2   | 2   | 1.5 | 2   | 2   | 2   | 2 | 1.5 | 1   | 0 | 2 | 2 |
| Low frequency pulsed electromagnetic field promotes differentiation of oligodendrocyte precursor cells through upregulation of miR-219-5p in vitro                                     | 1.5 | 1.5 | 0   | 2 | 2 | 2   | 1.5 | 1.5 | 1.5 | 1   | 2   | 2   | 2 | 2   | 2   | 0 | 0 | 2 |
| Low-Field Magnetic Stimulation Accelerates the Differentiation of Oligodendrocyte Precursor Cells via Non-canonical TGF- $\beta$ 2 Signaling Pathways                                  | 2   | 1   | 0   | 0 | 0 | 2   | 1.5 | 1   | 1.5 | 2   | 2   | 2   | 2 | 2   | 2   | 0 | 0 | 2 |
| Neurite Outgrowth on Chromaffin Cells Applying Extremely Low Frequency Magnetic Fields by Permanent Magnets                                                                            | 2   | 1.5 | 0   | 2 | 0 | 2   | 1   | 1.5 | 2   | 2   | 2   | 2   | 2 | 1.5 | 1.5 | 0 | 0 | 0 |
| Neuronal differentiation of chromaffin cells in vitro, induced by extremely low frequency magnetic fields or nerve growth factor: A histological and ultrastructural comparative study | 2   | 0   | 0   | 0 | 0 | 2   | 0   | 1   | 2   | 0   | 2   | 2   | 2 | 1   | 0.5 | 0 | 0 | 1 |
| Neurophysiological Effects Induced in the Nervous Tissue by Low-Frequency, Pulsed Magnetic Fields                                                                                      | 1   | 0.5 | 0   | 0 | 0 | 1   | 0   | 2   | 2   | 1.5 | 1.5 | 1.5 | 1 | 1.5 | 2   | 0 | 0 | 1 |
| Possible promotion of neuronal differentiation in fetal rat brain neural progenitor cells after sustained exposure to static magnetism                                                 | 2   | 1   | 0   | 2 | 2 | 2   | 1   | 2   | 1.5 | 2   | 2   | 2   | 2 | 1.5 | 1   | 0 | 0 | 0 |
| Pulsed magnetic field promotes proliferation and neurotrophic genes expression in Schwann cells in vitro                                                                               | 1.5 | 1   | 0   | 0 | 0 | 1.5 | 1   | 1   | 2   | 2   | 1.5 | 2   | 2 | 2   | 1.5 | 0 | 0 | 2 |
| Repetitive magnetic stimulation promotes neural stem cells proliferation by upregulating MiR-106b in vitro                                                                             | 2   | 0.5 | 0   | 2 | 2 | 2   | 1.5 | 1.5 | 2   | 2   | 2   | 2   | 2 | 1.5 | 2   | 0 | 2 | 2 |
| Static Magnetic Field Induced Neural Stem/Progenitor Cell Early Differentiation and Promotes Maturation                                                                                | 1.5 | 0.5 | 0   | 0 | 0 | 2   | 1   | 1.5 | 1.5 | 2   | 1.5 | 2   | 2 | 2   | 1.5 | 0 | 2 | 2 |
| Static Magnetic Field Stimulation Enhances Oligodendrocyte Differentiation and Secretion of Neurotrophic Factors                                                                       | 2   | 1   | 0.5 | 0 | 0 | 2   | 1   | 1.5 | 2   | 2   | 2   | 2   | 2 | 1.5 | 0.5 | 0 | 2 | 2 |

|                                                                                                                                                                       |     |     |   |     |   |   |     |     |     |     |     |     |   |     |     |     |   |   |
|-----------------------------------------------------------------------------------------------------------------------------------------------------------------------|-----|-----|---|-----|---|---|-----|-----|-----|-----|-----|-----|---|-----|-----|-----|---|---|
| The effect of magnetic stimulation on differentiation of human induced pluripotent stem cells into neuron                                                             | 2   | 0   | 0 | 2   | 0 | 2 | 1   | 1.5 | 2   | 2   | 1.5 | 2   | 2 | 2   | 1.5 | 0   | 2 | 2 |
| The effects of high-intensity pulsed electromagnetic field on proliferation and differentiation of neural stem cells of neonatal rats in vitro                        | 1.5 | 0.5 | 0 | 0   | 0 | 2 | 1   | 1   | 1.5 | 1.5 | 2   | 0.5 | 2 | 0.5 | 1   | 0   | 0 | 0 |
| Effects of 50 Hz electromagnetic fields on voltage-gated Ca2+ channels and their role in modulation of neuroendocrine cell proliferation and death                    | 2   | 1.5 | 0 | 0   | 2 | 2 | 0.5 | 1   | 2   | 2   | 2   | 2   | 2 | 1.5 | 1.5 | 0   | 0 | 1 |
| Extremely low-frequency electromagnetic fields enhance the proliferation and differentiation of neural progenitor cells cultured from ischemic brains                 | 2   | 1.5 | 0 | 0   | 0 | 2 | 1   | 2   | 2   | 2   | 1.5 | 2   | 1 | 1.5 | 2   | 0   | 0 | 2 |
| Magnetic field exposure saves rat cerebellar granule neurons from apoptosis in vitro                                                                                  | 2   | 1.5 | 0 | 1.5 | 0 | 2 | 0   | 1   | 2   | 2   | 2   | 1.5 | 2 | 0.5 | 0.5 | 0   | 0 | 1 |
| Fifty Hertz Extremely Low-Frequency Magnetic Field Exposure Elicits Redox and Trophic Response in Rat-Cortical Neurons                                                | 2   | 1.5 | 0 | 0   | 0 | 2 | 1.5 | 1   | 2   | 2   | 1.5 | 2   | 2 | 1.5 | 2   | 0   | 0 | 1 |
| Neuroprotective effect of weak static magnetic fields in primary neuronal cultures                                                                                    | 1.5 | 2   | 0 | 1.5 | 2 | 2 | 1.5 | 1   | 2   | 2   | 1.5 | 2   | 2 | 1.5 | 1   | 0   | 0 | 0 |
| Extremely low-frequency electromagnetic fields enhance the survival of newborn neurons in the mouse hippocampus                                                       | 1.5 | 1.5 | 0 | 0   | 2 | 2 | 2   | 1.5 | 2   | 2   | 2   | 2   | 2 | 1.5 | 1.5 | 0.5 | 0 | 1 |
| Epigenetic Modulation of Adult Hippocampal Neurogenesis by Extremely Low-Frequency Electromagnetic Fields                                                             | 2   | 1.5 | 0 | 2   | 2 | 2 | 1.5 | 1.5 | 1.5 | 2   | 1.5 | 2   | 1 | 1.5 | 2   | 0.5 | 2 | 1 |
| Electromagnetic fields affect transcript levels of apoptosis-related genes in embryonic stem cell-derived neural progenitor cells                                     | 2   | 1.5 | 0 | 1.5 | 2 | 2 | 1   | 0.5 | 2   | 2   | 1.5 | 2   | 1 | 1.5 | 1.5 | 0   | 0 | 1 |
| Extremely Low-Frequency Electromagnetic Fields Promote In Vitro Neuronal Differentiation and Neurite Outgrowth of Embryonic Neural Stem Cells via Up-Regulating TRPC1 | 1.5 | 1.5 | 0 | 0   | 0 | 2 | 1.5 | 2   | 2   | 2   | 1.5 | 2   | 1 | 1.5 | 2   | 0   | 2 | 0 |
