# Supplementary material for: Mapping the Landscape of Magnetic Field Effects on Neural Regeneration and Repair: A Combined Systematic Review, Mathematical Model, and Meta-Analysis
Source: Hindawi journal article supplement (doi:10.1155/2023/5038317), 2023-09-21
Supplement: f1 [file 5038317.f1.zip]

**Table S7: Inputs for quadratic and linear simulations  $a$  and  $b$  guesses**

Column titles: Variable Name (Categorical Dependent Variable), Linear/Polynomial (Fit of raw data), Independent Variable (magnetic field parameter), Maximum RMSE over 10 -200% B (constant A) (Largest value obtained of the RMSE by varying one coefficient (A or B) from 10 -200 %), Maximum RMSE over 10 – 200% A (constant B)

Monoatomic refers to a polynomial that is strictly increasing or decreasing. Polynomial refers to a polynomial that increases and decreases.

| Variable Name          | Linear/ Polynomial | Independent Variable | Maximum RMSE over 10-200% B (constant A) | Maximum RMSE over 10-200% A (constant B) |
|------------------------|--------------------|----------------------|------------------------------------------|------------------------------------------|
| Maturation             | Linear             | Frequency            | 550 (polynomial)                         |                                          |
|                        | Polynomial         | Frequency            | 900 (polynomial)                         | 900 (polynomial)                         |
|                        | Linear             | Magnitude            | 17000 (monoatomic)                       |                                          |
|                        | Polynomial         | Magnitude            | 1100 (polynomial)                        | 8000 (polynomial)                        |
|                        | Linear             | Percent              | 340000 (monoatomic)                      |                                          |
|                        | Polynomial         | Percent              | ~0 (linear)                              | 5.75e7 (linear)                          |
|                        | Linear             | Total Time           | 300 (polynomial)                         |                                          |
|                        | Polynomial         | Total Time           | 600 (polynomial)                         | 500 (polynomial)                         |
| Neuron Differentiation | Linear             | Magnitude            | 22 (linear)                              |                                          |
|                        | Polynomial         | Magnitude            | 25 (linear)                              | 2 (linear)                               |
|                        | Linear             | Total time           | 2250 (linear)                            |                                          |
|                        | Polynomial         | Total time           | 1300 (polynomial)                        | 1000 (polynomial)                        |
| Viability              | Linear             | Magnitude            | 26 (polynomial, monoatomic)              |                                          |
|                        | Polynomial         | Magnitude            | 35 (polynomial, monoatomic)              | 4 (linear)                               |
|                        | Linear             | Percent              | 800000 (linear)                          |                                          |
|                        | Polynomial         | Percent              | ~0 (linear)                              | 1.6e8 (linear)                           |
|                        | Linear             | Total Time           | 1300 (polynomial, monoatomic)            |                                          |
|                        | Polynomial         | Total Time           | 1000 (polynomial)                        | 600 (polynomial)                         |
