# Supplementary material for: Mapping the Landscape of Magnetic Field Effects on Neural Regeneration and Repair: A Combined Systematic Review, Mathematical Model, and Meta-Analysis
Source: Hindawi journal article supplement (doi:10.1155/2023/5038317), 2023-09-21
Supplement: f1 [file 5038317.f1.zip]

**Table S1: PECO inclusion criteria and search terms**

List of PECO inclusion criteria and search terms

| PECO         | Inclusion criteria                                                                                                                                                                                 |
|--------------|----------------------------------------------------------------------------------------------------------------------------------------------------------------------------------------------------|
| P (Patient)  | Human or mammal neural cells                                                                                                                                                                       |
| E (Exposure) | Magnetic field                                                                                                                                                                                     |
| C            |                                                                                                                                                                                                    |
| (Comparison) | Human or mammal neural cells that are not exposed to magnetic field                                                                                                                                |
| O (Outcome)  | Regenerative processes (differentiation, proliferation, growth, viability)                                                                                                                         |
| Study design | Original research article published in peer reviewed publication                                                                                                                                   |
| Excluded     | Whole organism/animal/human included, article not written in English, MRI, bacteria, plant cells, tissues that are not muscle or nerve tissue                                                      |
| Search Terms | "magnetic field" AND ("tissue" OR "cells") AND ("human" OR "animal") AND ("muscle" OR "brain" OR "neuron") AND ("proliferation" OR "migration" OR "differentiation" OR "regeneration") NOT ("MRI") |
