# Supplementary material for: Mapping the Landscape of Magnetic Field Effects on Neural Regeneration and Repair: A Combined Systematic Review, Mathematical Model, and Meta-Analysis
Source: Hindawi journal article supplement (doi:10.1155/2023/5038317), 2023-09-21
Supplement: f1 [file 5038317.f1.zip]

**Table S6: Variable definition for simulations**

X – axis: Class (Regenerative dependent variables), up/downregulate (an increase in a cellular marker result in an increase of a regenerative dependent variable), Variable (specific cellular markers/ characteristics), Description (of the specific cellular markers), Applicable Studies (number of manuscripts that utilize a specific variable)

\*=characteristic is included in two categories (regenerative dependent variable)

\*\*= characteristic is included in three categories (regenerative dependent variable)

| Class           | Up/down regulate | Variable | Description                           | Applicable Studies (put reference in eventually) | Variable      | Description                                  | Applicable Studies |
|-----------------|------------------|----------|---------------------------------------|--------------------------------------------------|---------------|----------------------------------------------|--------------------|
| Differentiation | Up               | NSE      | Neuron specific enolase               | 1                                                | O4            | Oligodendrocyte marker                       | 1                  |
|                 |                  | GFAP     | Glial Fibrillary Astrocyte Protein    | 6                                                | B-III tubulin |                                              | 2                  |
|                 |                  | Tuj1     |                                       | 6                                                | Nestin        |                                              | 1                  |
|                 |                  | NeuroD   |                                       | 3                                                | Galc          |                                              | 1                  |
|                 |                  | Mash1    |                                       | 3                                                | MBP           | Myelin basic protein                         | 1                  |
|                 |                  | Math3    |                                       | 3                                                | Olig1         |                                              | 1                  |
|                 |                  | Ngn1     | Neurogenin                            | 3                                                | miR-219-5p    |                                              | 1                  |
|                 |                  | Ngn2     |                                       | 3                                                | CNP           | 2',3' Cyclic Nucleotide 3' Phosphodiesterase | 2                  |
|                 |                  | Hes6     |                                       | 2                                                | SOX10         | Sry-type HMG box                             | 1                  |
|                 |                  | Olig2    | Oligodendrocyte transcription factor  | 1                                                | NT-3**        | Neurotrophin                                 | 2                  |
|                 |                  | Map2     | Microtubules associated protein       | 5                                                | NG2*          | Neuron-glial antigen                         | 1                  |
|                 |                  | DCX      | Doublecortin                          | 1                                                | NGF**         | Nerve growth factor                          | 1                  |
|                 |                  | Other    |                                       | 1                                                | TRKa**        | Neurotrophic receptor tyrosine kinase        | 1                  |
|                 |                  | TRKb**   |                                       | 1                                                | GDNF**        | Glial cell derived neurotrophic factor       | 1                  |
|                 |                  | pCREB**  | cAMP response element binding protein | 1                                                |               |                                              |                    |

|               |      |                              |                                                                          |   |                |                                              |   |
|---------------|------|------------------------------|--------------------------------------------------------------------------|---|----------------|----------------------------------------------|---|
|               | Down | Hes1**                       |                                                                          | 4 | s100**         |                                              | 3 |
|               |      | Hes5*                        |                                                                          | 3 | Lingo1*        | Leucine Rich Repeat and Ig Domain Containing | 1 |
| Proliferation | Up   | MTT assay*                   | 3 – (4,5 – dimethylthiazole– 2 – yl) – 2,5 – diphenyltetrazolium bromide | 3 | Cyclin D       |                                              | 1 |
|               |      | EdU                          | 5-Ethynyl-2'-deoxyuridine                                                | 4 | Cyclin E       |                                              | 1 |
|               |      | Primary NPs                  | neurospheres                                                             | 1 | Cyclin B       |                                              | 1 |
|               |      | Secondary NPs                |                                                                          | 1 | PCNA           | Proliferating cell nuclear antigen           | 1 |
|               |      | Sox2                         |                                                                          | 3 | NG2*           |                                              | 1 |
|               |      | Ki67                         |                                                                          | 1 | NGF**          |                                              | 1 |
|               |      | CCK-8 Assay*                 | Cell Counting Kit                                                        | 4 | TrkA**         |                                              | 1 |
|               |      | Cells in G1                  | Growth/ gap                                                              | 2 | TrkB**         |                                              | 1 |
|               |      | Cells in G2                  |                                                                          | 2 | pCREB**        |                                              | 1 |
|               |      | Cells in S                   | synthesis                                                                | 2 | Cells in M1    | Mitosis                                      | 1 |
|               |      | Neurosphere diameter         |                                                                          | 2 | Cells in M2    |                                              | 1 |
|               |      | BrdU                         | Bromodeoxyuridine                                                        | 4 | Cells in M3    |                                              | 1 |
|               |      | Total neurospheres (>50 um)  |                                                                          | 1 | Covered areas* |                                              | 1 |
|               |      | Total neurospheres (>100 um) |                                                                          | 1 |                |                                              |   |
|               | Down | Hes1**                       |                                                                          | 4 | s100**         |                                              | 3 |
|               |      | Hes5*                        |                                                                          | 3 | miR-338        |                                              | 1 |
|               |      | p53                          |                                                                          | 2 | miR-138        |                                              | 1 |

|           |      |                                |                                                  |   |                                           |                                                              |   |
|-----------|------|--------------------------------|--------------------------------------------------|---|-------------------------------------------|--------------------------------------------------------------|---|
|           |      | p21                            |                                                  | 2 | miR-9                                     |                                                              | 1 |
|           |      | GADD45                         | Growth arrest and DNA Damage-inducible           | 2 |                                           |                                                              |   |
| Viability | Up   | MTT Assay*                     |                                                  | 3 | TrkA**                                    |                                                              | 1 |
|           |      | CCK-8 Assay*                   |                                                  | 4 | TrkB**                                    |                                                              | 1 |
|           |      | BDNF**                         |                                                  | 3 | MTS                                       | Mitochondrial Targeting Sequence                             | 1 |
|           |      | NT-3**                         |                                                  | 2 | NGF**                                     |                                                              | 1 |
|           |      | Mitochondrial activity         |                                                  | 1 | PI/Calcein                                | Potassium iodide                                             | 1 |
|           |      | Cell membrane integrity (CFDA) | Carboxyfluorescein Diacetate Acetoxymethyl Ester | 1 | GDNF*                                     |                                                              | 1 |
|           |      | BCL2                           |                                                  | 1 |                                           |                                                              |   |
|           | Down | Hes1**                         |                                                  | 4 | TUNEL                                     | Terminal deoxynucleotidyl transferase dUTP nick end labeling | 1 |
|           |      | s100**                         |                                                  | 4 | DNA fragmentation apoptosis ratio         |                                                              | 1 |
|           |      | Flow cytometry apoptosis ratio |                                                  | 1 | Bax                                       | Bcl-2 Associated X-protein                                   | 1 |
| Growth    | Up   | Total length of neurite        |                                                  | 4 | NT-3**                                    |                                                              | 2 |
|           |      | Number of primary neurites     |                                                  | 1 | Number of cells showing neurite outgrowth |                                                              | 1 |
|           |      | Number of branch points        |                                                  | 1 | Covered area of flask                     |                                                              | 1 |
|           |      | BDNF**                         |                                                  | 3 |                                           |                                                              |   |
|           | Down | Nude axons                     |                                                  | 1 |                                           |                                                              |   |

\* = characteristic is included in two categories.

\*\* = characteristic is included in three categories
