# Supplementary figures and images for: Mapping the Landscape of Magnetic Field Effects on Neural Regeneration and Repair: A Combined Systematic Review, Mathematical Model, and Meta-Analysis
Source: Hindawi journal article supplement (doi:10.1155/2023/5038317), 2023-09-21

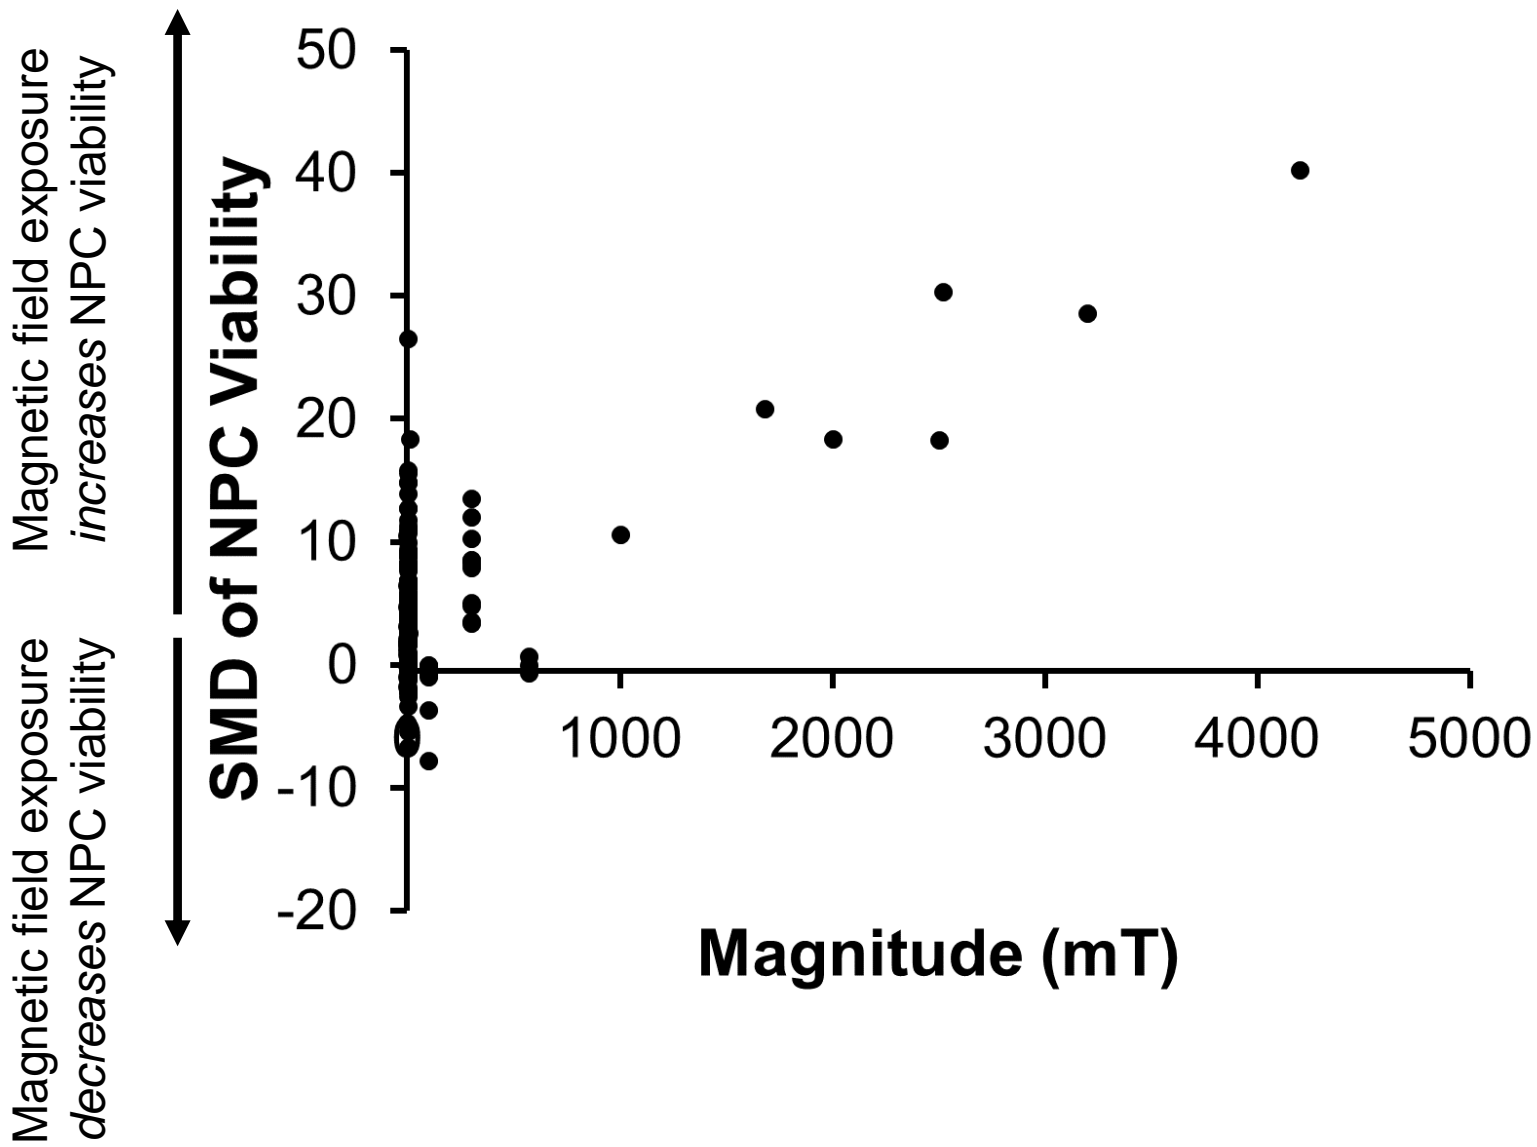

Supplement: f1 [file 5038317.f1.zip]
